## **A functional screening platform for engineering chimeric antigen receptors with reduced on-target, off-tumour activation**

**Raphaël B. Di Roberto, Rocío Castellanos Rueda, Samara Frey, David Egli, Rodrigo Vazquez-Lombardi, Sai T. Reddy<sup>1</sup>**

Department of Biosystems Science and Engineering, ETH Zürich, 4058 Basel, Switzerland

<sup>1</sup>To whom correspondence should be addressed. Tel: +41 61 387 33 68; Email: [sai.reddy@ethz.ch](mailto:sai.reddy@ethz.ch)

### **ABSTRACT**

Chimeric antigen receptor (CAR) T cell therapies have advanced substantially in the clinic for cancer immunotherapy. However, challenges related to safety persist; one major concern is when CARs respond to antigen present on healthy cells (on-target, off-tumour response). A strategy to ameliorate this consists in engineering the affinity of CARs such that they are only activated by tumor cells expressing high antigen levels. Here, we developed a CAR T cell display platform for functional screening based on cell signaling. Starting with a CAR with high affinity towards its target antigen, we used CRISPR-Cas9 genome editing to generate a library of antigen-binding domain variants. Following multiple rounds of functional screening and deep sequencing-guided selection, CAR variants were identified that were discriminatively activated by tumor cells based on antigen expression levels. Our platform demonstrates how directed evolution based on functional screening can be used to enhance the selectivity and safety of CARs.

## 1 INTRODUCTION

2 The clinical success of chimeric antigen receptor (CAR) T cells for cancer immunotherapy has demonstrated the  
3 potential of incorporating synthetic proteins in cellular therapeutics applications <sup>1</sup>. CARs are hybrid proteins  
4 consisting of antigen-binding domains [e.g. antibody single chain variable chain fragments (scFv)] and  
5 intracellular signaling domains derived from the T cell receptor (TCR): the CD3 complex and receptors mediating  
6 T cell co-stimulation (e.g., CD3 $\zeta$ , CD28, 4-1BB). Following viral delivery of CAR-encoding genes into T cells,  
7 the scFv enables recognition of tumour cells through surface antigen binding, while the intracellular signaling  
8 domains trigger the activation of a cytotoxic response. In a clinical setting, CAR T cells with specificity against  
9 the antigen CD19 have been successful in achieving partial and complete remission in patients with relapsed and  
10 refractory B cell leukemias and lymphomas <sup>2,3,4,5</sup>. As with other forms of adoptive T cell therapies, CAR therapies  
11 can be likened to “living drugs”, capable of achieving a sensitive, target-specific, self-amplifying and persistent  
12 response. But unlike cell therapies that rely on endogenous receptors, CARs benefit from their highly modular  
13 nature. For example, CAR specificity can be re-directed by engineering of the extracellular scFv domain without  
14 altering the other domains, thereby enabling targeting of a wide range of malignancies. Currently, clinical trials  
15 are underway to test the safety and efficacy of CARs against various tumour types and their antigens. These include  
16 cancers of the pancreas, liver, breast, gut and lung, all sharing tumour-associated antigens such as HER2,  
17 mesothelin, GD2 and CEA <sup>6</sup>.

18  
19 Although CAR therapies have shown clear clinical effectiveness against CD19-expressing B cell malignancies,  
20 other cancers have proven more challenging. Several pre-clinical and clinical trials have reported instances of on-  
21 target, off-tumour toxicities after CAR T administration <sup>7,8,9,10</sup>. Since healthy cells also have low-level expression  
22 of tumour-associated antigens (TAAs), CAR T cells can target such healthy tissue and lead to adverse events. This  
23 lack of specificity at the tissue level can be devastating for the organs affected and can require immediate treatment  
24 cessation due to the risk of patient fatality <sup>8</sup>. In contrast, while the CD19 antigen is also present on healthy B cells,  
25 B cell aplasia resulting from CAR therapy is a manageable condition. The use of CAR T cells against non-CD19  
26 cancers will thus require novel solutions in order to avoid serious adverse effects. HER2 is a prime immunotherapy  
27 antigen due to its overexpression in a wide range of cancers, most notably in mammary tumours <sup>11</sup>, and its validity  
28 as a therapeutic target is well supported by the long success of the monoclonal antibody trastuzumab (Herceptin)  
29 in improving patient survival <sup>12</sup>. While a T cell-based therapy targeting HER2 has the potential to induce a long  
30 term, persistent response, the downregulation of surface MHC-I in HER2-overexpressing cells makes this  
31 challenging <sup>13,14</sup>. CARs constitute an attractive alternative to the TCR, as they do not rely on MHC-based antigen  
32 presentation. Targeting HER2 with a CAR derived from the trastuzumab antibody was an effective strategy in a  
33 xenograft study <sup>15</sup>, but proved fatal to a patient in a subsequent clinical trial <sup>8</sup>. The respiratory distress and cytokine  
34 storm that followed CAR T cell injection were attributed to low levels of HER2 surface expression on normal lung  
35 epithelial cells.

36  
37 Various strategies have been explored for improving the cell and tissue specificity of CAR T cell therapy. One  
38 common approach takes advantage of combinatorial antigen recognition, which involves the use of multiple  
39 receptors <sup>16,17,18,19</sup> and/or soluble targeting molecules <sup>20,21</sup> to induce logical decision-making in CAR T cells.  
40 Alternatively, the incorporation of suicide genes can be used to rapidly shut down a treatment gone awry <sup>22</sup>.  
41 However, all these approaches require the genomic integration of multiple transgenes or a combination of

42 transgenes and biologics, making an already complex therapy even more difficult to administer. Tuning the antigen  
43 binding affinity of a CAR scFv domain offers a simpler solution that is enabled by the existence of an apparent  
44 maximal T cell response above a receptor affinity threshold<sup>23</sup>. This process typically involves selecting low  
45 affinity antibody or scFv variants from random or rational libraries and “exporting” the best candidates to a CAR  
46 format for further testing<sup>24, 25, 26, 27, 28, 29</sup>. However, since the threshold for selectivity is unknown and may be  
47 context-dependent, many promising candidates fail once they are expressed as CARs.

48  
49 Here, we report a T cell platform for CAR display that enables the engineering of variants based on antigen binding  
50 and/or signaling-based screening. Development of the platform required multiple steps of CRISPR-Cas9 genome  
51 editing, most notably the targeted integration of CAR genes into the unique genomic locus of the variable domain  
52 of the TCR  $\beta$  chain. As a measure of functionality, a green fluorescence reporter (GFP) reporter gene was  
53 integrated downstream of the endogenous interleukin-2 (IL-2) gene, facilitating high-throughput screening of  
54 activated T cells by fluorescence-activated cell sorting (FACS). We validated this functional screening approach  
55 by tuning the affinity of a CAR scFv domain with specificity towards the clinically relevant breast cancer antigen  
56 HER2. Starting with a scFv derived from the HER2-targeting therapeutic antibody trastuzumab, we generated a  
57 deep mutational scanning (DMS) library of CAR variants directly in our T cell platform via Cas9-mediated  
58 homology-directed repair (HDR). This library was then subjected to a series of iterative selection rounds based on  
59 IL-2 signaling activation following co-culture with a high-HER2-expressing cell line (SKBR3). For comparison,  
60 we also selected both weak and strong binders using soluble HER2 antigen. Deep sequencing was used to identify  
61 potential CAR variants that had lower binding affinity while maintaining similar signaling activation. Several  
62 variants from the signaling-based selection process showed enhanced discriminative recognition of target cells in  
63 a scenario mimicking on-target, off-tumour effects. These findings demonstrate the value of tuning CARs by using  
64 functional signaling-based screening and could be used as a general strategy for engineering CARs with both fine  
65 antigen specificity and target cell selectivity.

66

## 67 **RESULTS**

### 68 *Genome engineering of a T cell platform for CAR display and functional screening*

69 We generated a CAR display platform through a series of CRISPR-Cas9-based genome editing steps in the murine  
70 T hybridoma cell line B3Z<sup>30</sup>. Previous work has shown that constitutive Cas9 expression in a cell line significantly  
71 enhances efficiency of non-homologous end joining (NHEJ) and HDR<sup>31</sup>. Therefore, as our first step, we targeted  
72 the genomic safe-harbour locus *ROSA26* with exogenous Cas9 protein complexed with guide RNA (gRNA) and  
73 an HDR template encoding genes for Cas9 and blue fluorescent protein (BFP) under the control of the human  
74 CMV promoter (Figure 1a). This integration was confirmed by PCR amplification and Sanger sequencing  
75 (Supplementary Figure 1a, c). The functionality of endogenous Cas9 was subsequently affirmed through the  
76 NHEJ-mediated knock out of the BFP gene by transfecting BFP-targeting gRNA alone (Figure 1b).

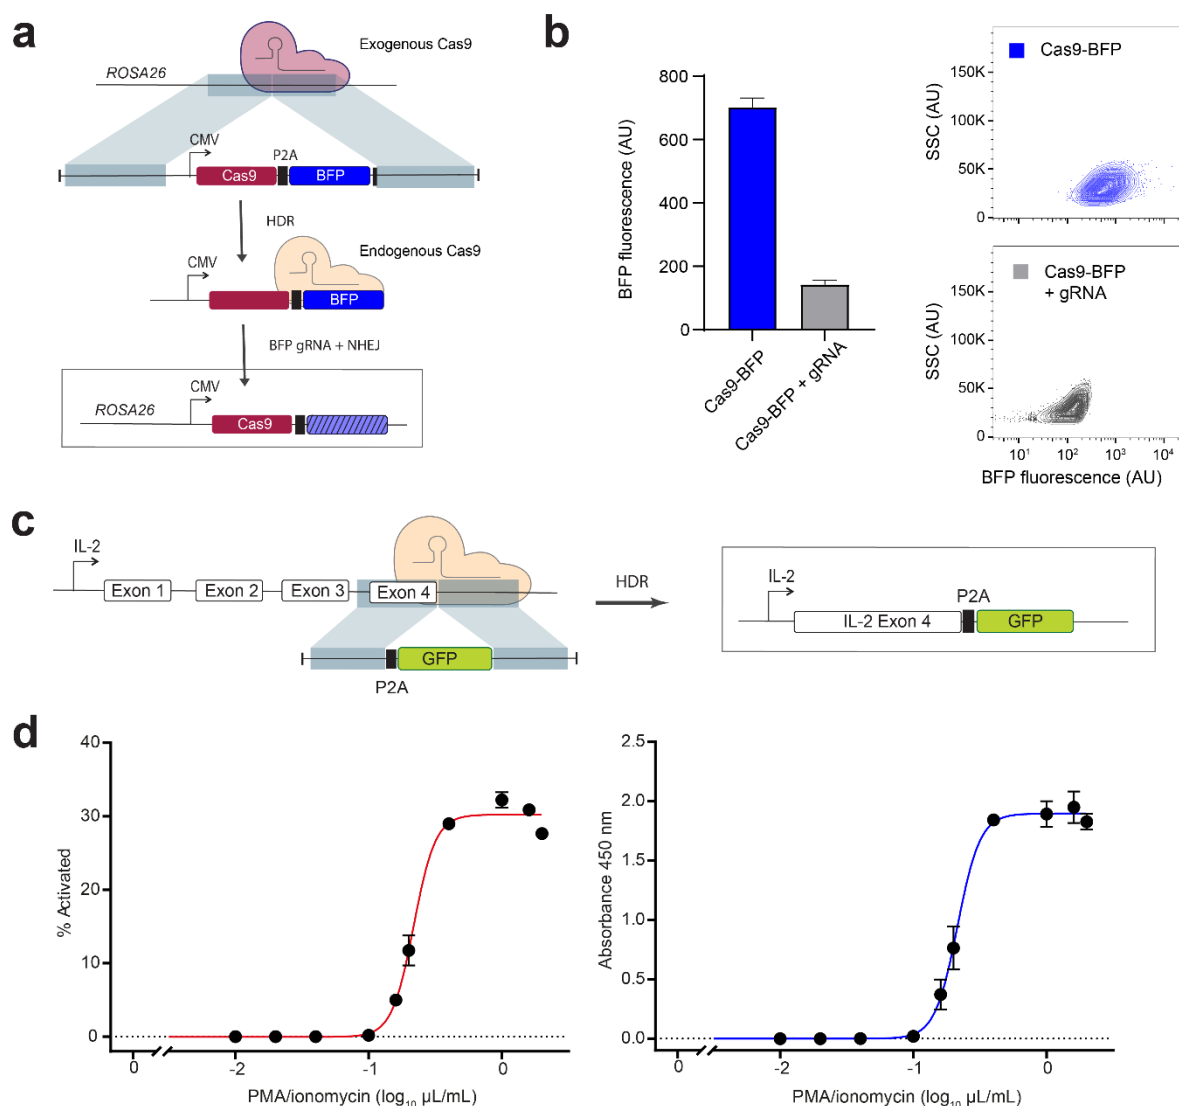

77

78 **Figure 1: Engineering a reporter of IL-2 signaling in T cells by genome editing**

79 **a** Integration of a Cas9 expression cassette in the genome of the B3Z T cell line at the safe harbour *ROSA26* locus  
80 using exogenous Cas9 protein and guide RNA (gRNA). The expression cassette consists of a gene encoding the  
81 Cas9 ORF, a P2A self-cleaving peptide sequence, and a BFP ORF under the control of the human cytomegalovirus  
82 (CMV) immediate-early enhancer and promoter. The constitutive expression of endogenous Cas9 was thereafter  
83 confirmed by the efficient disruption of the BFP ORF through the electroporation of BFP-targeting gRNA alone.  
84 **b** Histogram and flow cytometry plots showing difference in fluorescence between T cells expressing Cas9 before  
85 (blue population) and after (grey population) the knockout of BFP by gRNA electroporation. **c** Integration of a  
86 P2A peptide and GFP ORF immediately downstream of the final ORF of IL-2 in the genome of the Cas9-  
87 expressing B3Z cell line. **d** Dose-response curve of IL2-GFP expression in engineered T cells. Following overnight  
88 incubation with varying concentrations of the cell stimulation cocktail PMA/ionomycin (1X: 2 μL/mL), cells and  
89 culture supernatants were collected and assayed. The fraction of GFP-positive cells was measured by flow  
90 cytometry while IL-2 levels were measured by ELISA. The fraction of activated cells (red curve) matches the IL-  
91 2 secretion (blue curve) in terms of sensitivity, confirming that GFP fluorescence is a suitable reporter of IL-2  
92 secretion.

93

94 IL-2 cytokine secretion is a reliable marker of T cell activation following antigen engagement and co-stimulation.  
95 Therefore, in order to generate a signaling reporter suitable for high-throughput screening, we used Cas9-mediated  
96 HDR to integrate a GFP open reading frame immediately downstream of the last exon of the endogenous IL-2  
97 gene (Figure 1c), which was once again confirmed by PCR amplification and Sanger sequencing (Supplementary

98 Figure 1b, d). An intervening P2A peptide ensures that GFP is not fused and secreted along with the cytokine. We  
 99 confirmed by enzyme-linked immunoabsorbance assay (ELISA) that the genome edited T cells were still able to  
 100 secrete IL-2 upon stimulation with a T cell activation cocktail of PMA/ionomycin. Interestingly, we found that the  
 101 fraction of cells expressing GFP (not mean GFP intensity) scaled with cocktail concentration, and that the resulting  
 102 dose-response curve matched well with that of IL-2 secretion (Figure 1d, Supplementary Figure 2). This binary  
 103 response stands in contrast to previous work involving other T cell signaling reporters, such as nuclear factor of  
 104 activated T cells (NFAT)<sup>32, 33, 34</sup>, and may reflect our use of the endogenous IL-2 promoter. Going forward, we  
 105 used the fraction of GFP-expressing cells as our T cell activation metric.

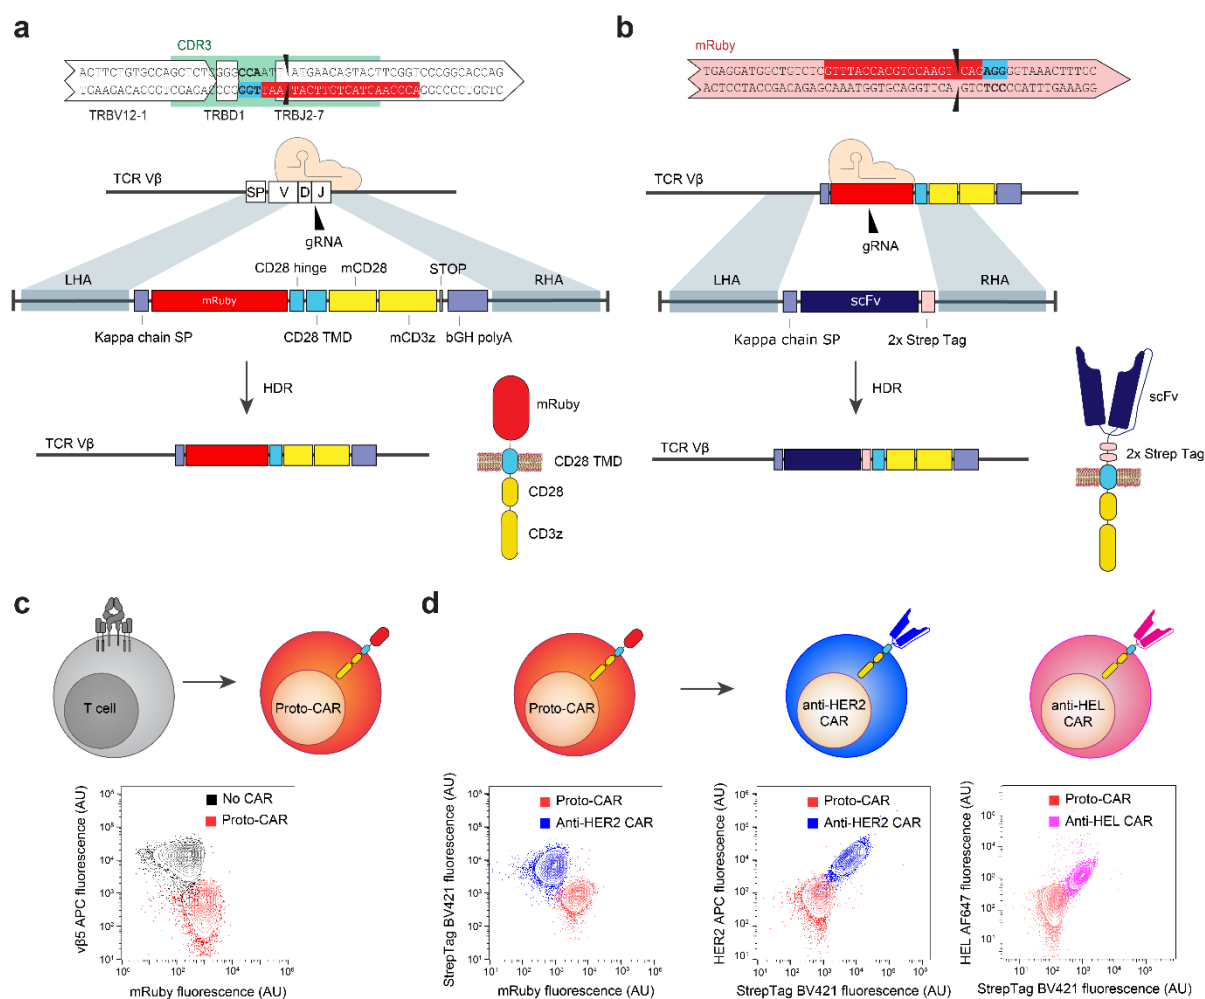

106

107 **Figure 2: CAR expression and antigen binding in a T cell display platform**

108 **a** CRISPR-Cas9 HDR is used for integration of a prototypical CAR (proto-CAR) in the unique CDRβ3 region of  
 109 the TCRβ chain locus of engineered B3Z T cells. Double-stranded DNA with left and right homology arms (LHA  
 110 and RHA) serves as repair template. A splice acceptor ensures that the CAR is on the same transcript and a signal  
 111 peptide directs the protein to the secretory pathway. The proto-CAR includes a standard chassis with the CD28  
 112 hinge, transmembrane domain and co-signaling domain, and the CD3ζ signaling domain. The fluorescent protein  
 113 mRuby is on the extracellular side of the CAR, as a placeholder for an scFv of choice. **b** CRISPR-Cas9 is used to  
 114 replace the mRuby domain of the proto-CAR for a scFv and two Strep tags for detection. **c, d** Sequential genome  
 115 engineering of T cell lines for the display of CARs with flow cytometry plots confirming CAR expression. The  
 116 integration of the proto-CAR disrupts the surface expression of the endogenous TCR. This proto-CAR is then  
 117 targeted to introduce an scFv of choice, such as one targeting the tumour antigen HER2 (blue cell schematic) or  
 118 the model antigen HEL (pink cell schematic). The swapping of mRuby for an scFv can be detected by flow  
 119 cytometry as the abrogation of mRuby fluorescence, the presence of a Strep tag II and the ability to bind labeled  
 120 antigen.

121  
122 Our next step was to genome engineer our reporter T cell line for CAR surface expression and signaling. The B3Z  
123 cell line expresses a TCR specific for an ovalbumin-derived peptide (SIINFEKL) presented on MHC-I<sup>30</sup>.  
124 Therefore, we chose to target the TCR variable  $\beta$  chain complementarity determining region 3 (CDR $\beta$ 3) for Cas9-  
125 mediated HDR of a CAR gene construct. Because of the diversity of V(D)J recombination, the CDR $\beta$ 3 represents  
126 a unique genomic target site, which ensures that CAR expression is limited to a single variant per cell, eliminating  
127 confounding effects that can result from the multi-allelic or multi-site integration of different CAR variants.  
128 Targeting CAR integration into the V $\beta$  chain locus also simultaneously ensures knock-out of the endogenous TCR.  
129 To provide a chassis for rapid CAR specificity changes, we first integrated a “proto-CAR” at the CDR $\beta$ 3 locus.  
130 This CAR gene chassis is composed of the hinge and transmembrane domains of CD28 and the intracellular  
131 signaling domains of CD28 and CD3 $\zeta$ , while lacking a typical binding domain, harbouring instead the fluorescent  
132 protein mRuby on its extracellular side (Figure 2a). The expression of mRuby provides a fluorescence reporter  
133 that can be used to easily detect HDR<sup>35</sup>. We first confirmed integration by PCR amplification and Sanger  
134 sequencing (Supplementary Figure 1e) and then by flow cytometry we confirmed that this proto-CAR was  
135 expressed and that TCR expression was abrogated (Figure 2c). Next, we electroporated cells with gRNA targeting  
136 mRuby and HDR templates encoding scFv genes specific against the model antigen Hen Egg Lysozyme (HEL)  
137 (variant M3<sup>36</sup>) or human breast cancer antigen HER2 (variant 4D5/trastuzumab<sup>37</sup>) (Figure 2b). Surface expression  
138 of CARs was confirmed by the presence of two Strep tags in the linker region between the scFv and the CD28  
139 hinge domain. The ability of the CARs to bind their respective target antigens was also confirmed using soluble  
140 fluorescently-labeled cognate antigens (Figure 2d).

#### 141 142 *CAR T cell signaling is activated with both high and low HER2-expressing cells*

143 We next determined if our CAR T cell display platform expressing the anti-HER2 scFv could be activated  
144 following co-culture with HER2-expressing cell lines. We first selected a panel of cancer cell lines known to  
145 express different levels of HER2 on their surface<sup>38</sup>. Flow cytometry confirmed that SKBR3, MCF-7 and HEK293  
146 cells express decreasing levels of surface HER2 (Figure 3a). These cell lines therefore provide a model system for  
147 evaluating on-target, off-tumour toxicity of CAR T cells whereby SKBR3 represent tumour cells (high expression  
148 of HER2) and MCF-7 and HEK293 mimic off-target healthy cells (low expression of HER2). These cell lines were  
149 then co-cultured with CAR T cells expressing anti-HER scFV or anti-HEL scFv (negative control) and activation  
150 was measured through IL-2-linked GFP expression via flow cytometry (Figure 3b and c). Correlating with the  
151 amount of HER2 expression on the different cell lines, we observed substantial anti-HER2 CAR T cell activation  
152 in the presence of SKBR3 and MCF-7 cells, but not with HEK293, while anti-HEL CARs failed to elicit significant  
153 T cell activation with any co-cultured cells. We also tested a CAR based on the phage-derived scFv F5 for which  
154 affinity is estimated to be 275-fold lower than 4D5<sup>26,39</sup> but it was shown to be largely unresponsive to our cell  
155 lines. Interestingly, T cell activation appeared to correlate with trogocytosis, the transfer of antigen from target  
156 cells to lymphocytes, which is consistent with a recent study<sup>40</sup>.

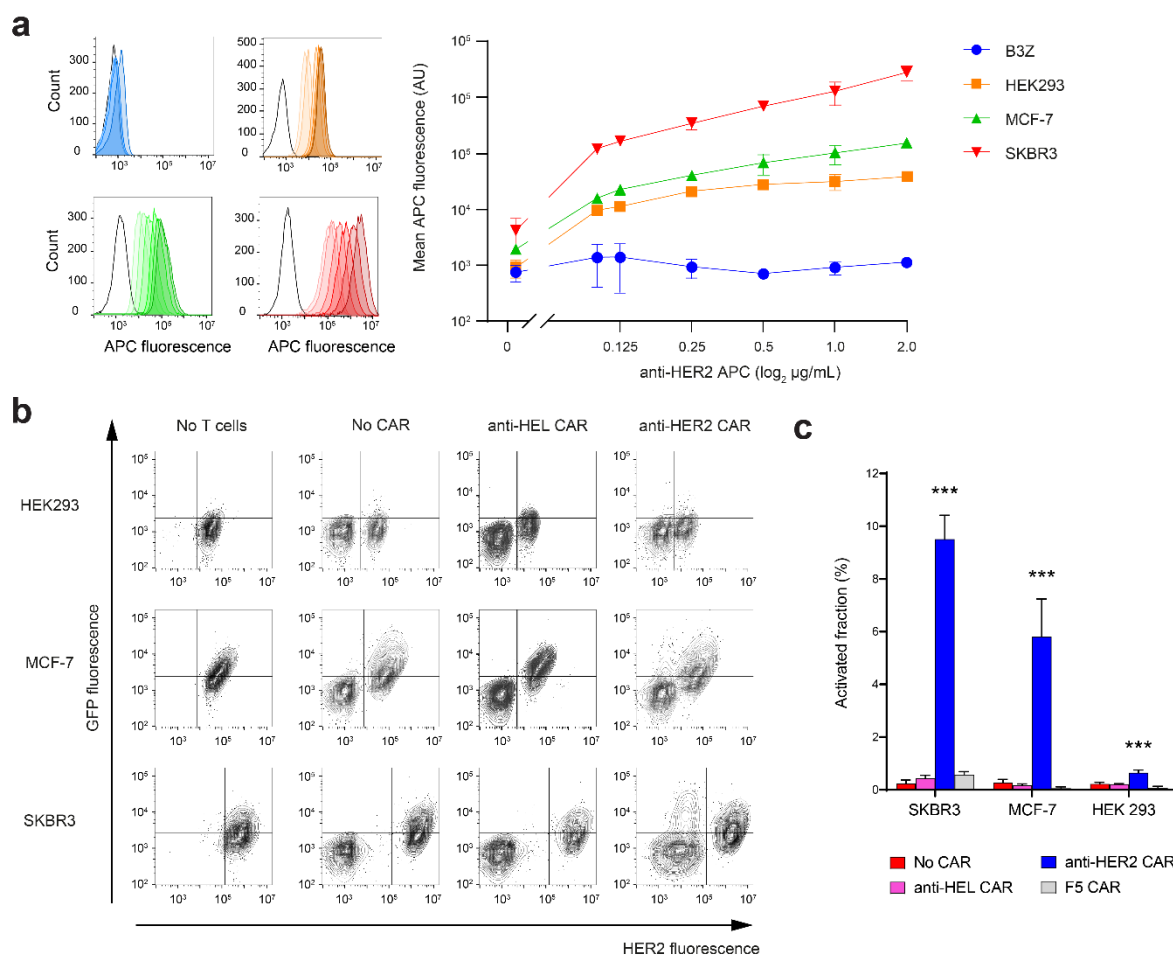

157

158 **Figure 3: A CAR with a high affinity scFv shows a limited ability to discriminate between cell lines**  
 159 **expressing different antigen levels**

160 **a** Surface HER2 expression levels across the cell lines used in this study. Each cell line was stained with varying  
 161 concentrations of anti-HER2 monoclonal antibody labeled with APC. Fluorescence was measured by flow  
 162 cytometry and plotted in frequency histograms as follow: top left plot: B3Z; top right plot: HEK293; bottom left  
 163 plot: MCF-7; bottom right plot: SKBR3. Mean fluorescence was plotted for all cell lines as a function of antibody  
 164 concentration. SKBR3 shows the highest surface HER2 expression, followed by MCF-7, HEK293 and B3Z in  
 165 descending order. **b** CAR T cells possessing a high affinity anti-HER2 scFv domain (4D5) were co-cultured with  
 166 HER2-expressing cell lines. Following a 16-hour co-culture, cells were collected and flow cytometry was  
 167 performed to measure HER2 and GFP expression. **c** Percentage of GFP-expressing T cells after co-culture with  
 168 HER2-expressing cell lines. T cells expressing the Herceptin-derived anti-HER2 CAR showed a significant  
 169 response to each tumour cell line compared to no CAR. Mean and S.E.M. were obtained from two independent  
 170 experiments conducted with triplicates. For assessing significance, Dunnett's multiple comparisons test was used  
 171 with the following indicators: \*  $P < 0.01$ , \*\*  $P < 0.001$ , \*\*\*  $P < 0.0001$ .

172

173 *Mutagenesis of a CAR and screening by antigen-mediated signaling or binding*

174 The significant T cell activation encountered in the presence of both SKBR3 and MCF-7 cells suggested that the  
 175 anti-HER2 CAR was not able to discriminate effectively between the antigen levels of each cell line. This is likely  
 176 due to the very high affinity of the 4D5 scFv clone (equilibrium dissociation constant,  $K_d \sim 0.1 \text{ nM}$ <sup>26</sup>). Using  
 177 SKBR3 and MCF-7 cells to model tumour and healthy cells, respectively, we thus proceeded to use our T cell  
 178 platform to engineer CAR variants that would retain activation in the presence of SKBR3 cells but show a reduced  
 179 signaling response to MCF-7 cells. Our engineering strategy was based on the possibility of tuning the binding  
 180 affinity of the scFv domain, such that a higher density of antigen molecules on the target cell's surface is needed

181 for successful T cell activation, thereby enabling greater cell-level selectivity. We hypothesized that our platform  
 182 was suitable for this application as introducing mutations in the scFv domain will generate variants with different  
 183 binding affinities and the IL-2-based signaling reporter could then be used to select for variants retaining  
 184 responsiveness to HER2 on SKBR3 cells.

185  
 186 In order to generate a library of CAR variants with diverse HER2 antigen binding affinities, we performed deep  
 187 mutational scanning (DMS) on the scFv domain. Specifically, we focused on the complementarity-determining  
 188 region 3 of the variable heavy chain (CDRH3), which is a major determinant of binding specificity<sup>41</sup>. The library  
 189 was generated directly in T cells by genome editing, where Cas9 is used to integrate a pool of single-stranded  
 190 oligodeoxynucleotide (ssODN) HDR templates to a pre-existing construct<sup>31,42</sup>. The HDR templates were based  
 191 on a DMS design of a single-site saturation mutagenesis library, where degenerate codons (NNK; N = A, C, G T;  
 192 K = G, T) are tiled across the 10 amino acids of the CDRH3 (Figure 4a). DMS libraries were screened and selected  
 193 by FACS for cells with CAR surface expression based on Strep tag display. Next, deep sequencing was performed  
 194 to assess the sequence landscape associated with CAR surface expression, demonstrating the expected diversity,  
 195 with 190 out of possible 191 variants present and no apparent selection bias (Figure 4b).  
 196

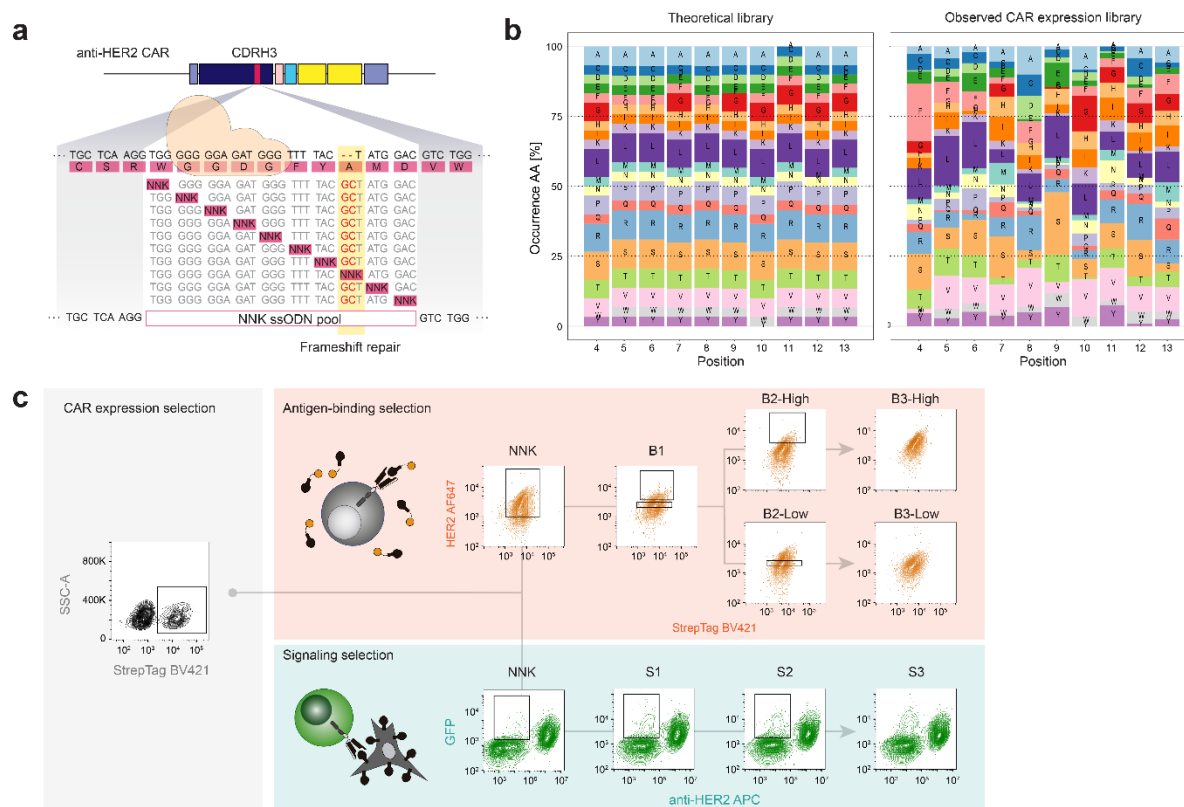

197  
 198 **Figure 4: Generating a deep mutational scanning (DMS) library of CARs and selecting functional variants**  
 199 **a** DMS of the CDRH3 region of the variable heavy chain of the CAR possessing the high affinity anti-HER2 scFv  
 200 domain (4D5). The original anti-HER2 CAR was disrupted by the introduction of a frameshift-inducing deletion  
 201 in the CDRH3. A set of degenerate ssODNs was then used to repair this deletion by CRISPR/Cas9 genome editing,  
 202 while also substituting each position with all possible amino acids in a non-combinatorial fashion, for a total of  
 203 191 variants. Successful genome editing resulted in recovery of CAR surface expression, whenever possible. **b**  
 204 Comparison of the theoretical (left) and observed (right) amino acid frequencies in the DMS library. Genomic  
 205 DNA was extracted and the CDRH3 locus amplified and sequenced to measure the amino acid frequencies. The  
 206 original 4D5 CDRH3 amino acids were not included in the histograms due to their overrepresentation. **c** FACS-



207 based selection of CAR variants according to their antigen response or binding ability. Following transfection of  
 208 the ssODN library, T cells expressing a CAR on their surface were selected based on Strep tag II staining (library  
 209 “NNK”). This library was then used in two selection strategies in parallel. In one strategy based on antigen binding  
 210 (“B”), a non-saturating concentration of soluble HER2 was used to select stronger (“High”) and weaker (“Low”)   
 211 binders iteratively. In the second strategy based on signaling (“S”), co-culture with the high HER2-expressing cell  
 212 line SKBR3 was followed by sorting according to GFP expression iteratively.

213  
 214 Next, we tested two approaches to select variants from the DMS library of CAR variants (Figure 4c). In one branch,  
 215 selection was performed on the basis of binding to soluble HER2 antigen (“B” libraries). Iterative rounds of sorting  
 216 were performed to select strong binders (B1, B2 High, B3 High) and weak binders (B1, B2 Low, B3 Low). In a  
 217 second branch, CAR library variants were co-cultured with SKBR3 cells and IL-2 linked GFP expression was used  
 218 to sort signaling responders (“S” libraries) in an iterative fashion (S1, S2, S3). The final libraries (B3-High, B3-  
 219 Low and S3) were compared by their ability to respond to co-cultures with each of the HER2-expressing cell lines  
 220 (Figure 5a and Supplementary Figure 3). The S3 library showed the highest ability to discriminate between the  
 221 cell lines, largely due to unchanged signaling with SKBR3 and reduced signaling to MCF-7. Conversely, the B3  
 222 libraries showed reduced signaling to both cell lines compared to the initial CAR. These differences could not be  
 223 accounted for by differences in CAR expression levels across libraries (Supplementary Figure 4).

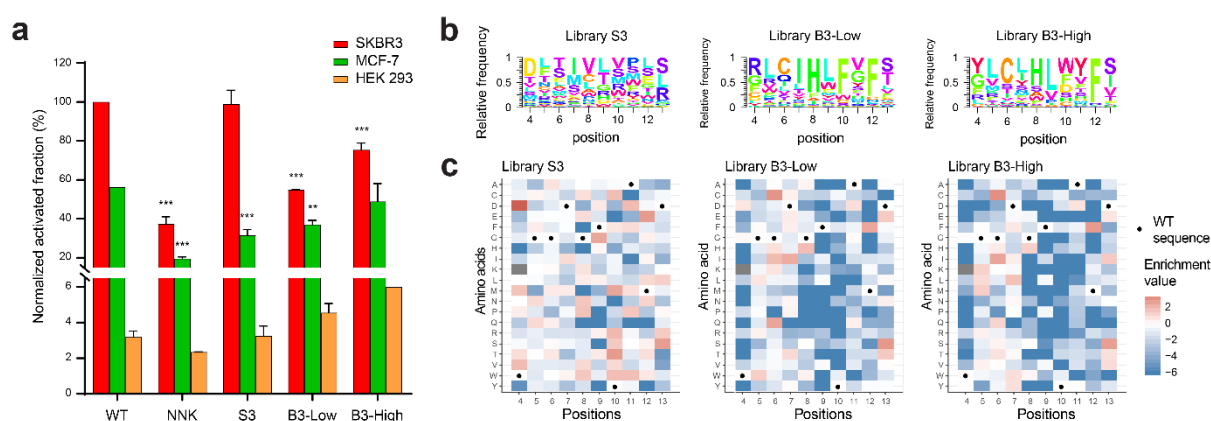

224  
 225 **Figure 5: Deep sequencing of the libraries reveals the enrichment of different CAR variants based on the**  
 226 **selection strategy.**

227 **a** Histogram of the response profiles of the wild-type anti-HER2 CAR T cells (WT), the initial (NNK) and the  
 228 endpoint (S3, B3-Low, B3-High). The T cells were co-cultured overnight with HER2-expressing cell lines and the  
 229 expression of GFP was measured by flow cytometry, revealing differences in the ability of libraries to discriminate  
 230 between antigen levels compared to WT. Mean and S.E.M. were obtained from two independent experiments  
 231 conducted with triplicates. For assessing significance, Dunnett’s multiple comparisons test was used with the  
 232 following indicators: \*  $P < 0.01$ , \*\*  $P < 0.001$ , \*\*\*  $P < 0.0001$  **b** Sequence logo plots of the relative frequencies  
 233 of the amino acid substitutions in the endpoint libraries. WT amino acids at each position are not shown. **c**  
 234 Enrichment ratios for each CAR variant in the three endpoint libraries S3, B3-Low and B3-High in heat map form.  
 235 Enrichment ratios were calculated as the ratio of the relative abundance of a sequence within an endpoint library  
 236 over its relative abundance in the initial NNK library.

237  
 238 *Identification of CAR variants that are selectively activated based on tumour antigen surface expression*

239 In order to identify single CAR variants showing an ability to discriminate across HER2 surface expression levels,  
 240 we performed deep sequencing on the final binding and signaling libraries and compared the relative frequencies  
 241 (Figure 5b) and the enrichment of single variants relative to the initial library (Figure 5c). The resulting enrichment  
 242 heatmaps revealed more negative selection (in the form of lower enrichment scores) in libraries B3-High and B3-  
 243 Low than for the S3 library, particularly at positions 8-12 of the CDRH3. Conversely, the S3 signaling library was

244 less constrained across the entire region and deviated strongly from the other two, suggesting that there is a  
 245 discordance between CAR antigen binding and signaling.

246  
 247 By using the deep sequencing data, we selected a set of variants from the S3 library based on high enrichment  
 248 (Figure 6a and b). Additionally, we selected four variants from B3-Low showing more enrichment than in B3-  
 249 High and three variants from B3-High. Cell lines of these CAR variants were then generated by Cas9-mediated  
 250 HDR and subsequently co-cultured with either SKBR3 or MCF-7 and monitored for signaling activation by IL-2  
 251 linked GFP expression (Figure 6c and d, Supplementary Figure 5 and 6). Among them, four variants from the S3  
 252 library showed significant discrimination between the high-HER2 SKBR3 and low-HER2 MCF-7 cells when  
 253 compared to the original CAR. Importantly, for variants M12E and Y10R, there was no reduction in responsiveness  
 254 towards SKBR3. None of the variants from the binding libraries were able to discriminate based on HER2 surface  
 255 expression, as they showed similar activation with both SKBR3 and MCF-7 cells, highlighting the difficulty of  
 256 using antigen-binding as the only selection approach.

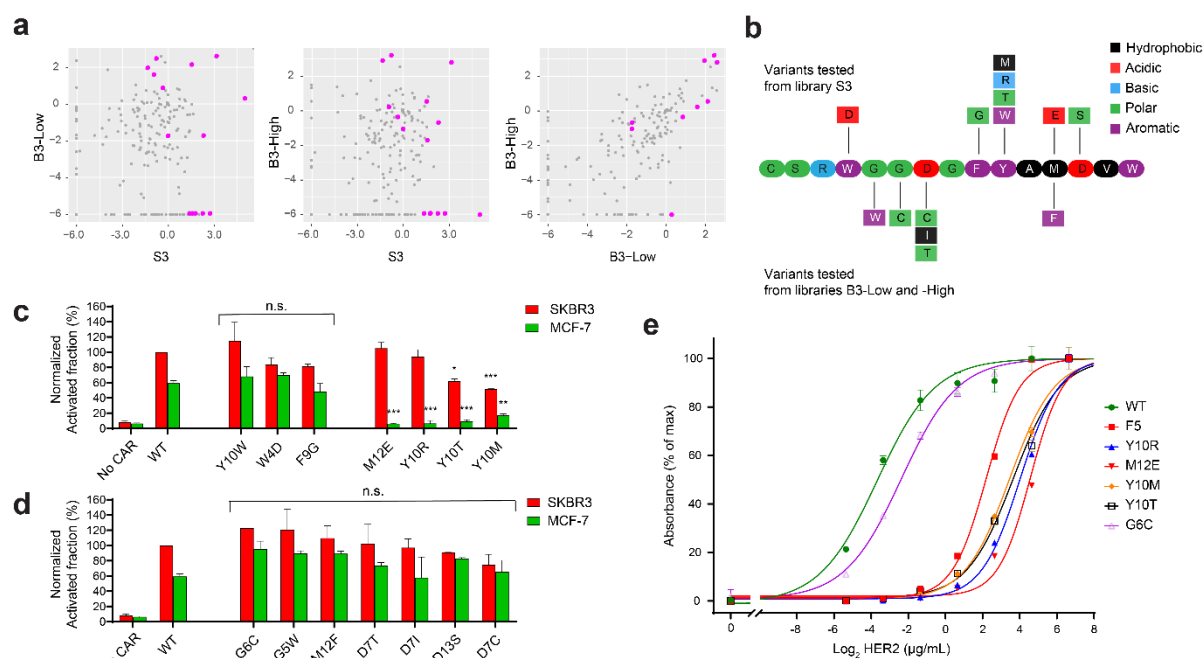

257  
 258 **Figure 6: CAR variants enriched by signaling-based selection exhibit discriminative activated based on**  
 259 **HER2 cell surface expression.**

260 **a** Scatter plot of the enrichment ratios for each variant across pairs of libraries. Variants selected for further study  
 261 are highlighted in pink. The S3 library stands out as exhibiting little correlation to the two binding selection-based  
 262 libraries. **b** Schematic of the CDRH3 region and the single-substitution variants individually selected based on  
 263 their enrichment ratios. **c, d** Bar graphs of normalized activation (fraction of IL-2-linked GFP-positive cells) from  
 264 CAR variants (selected in **a**) following co-culture with either SKBR3 (high HER2 expression) or MCF-7 (low  
 265 HER2 expression). Four variants, selected based on signaling, (M12E, Y10R, Y10T and Y10M) respond  
 266 significantly less to MCF-7 and of these, two (M12E and Y10R) show no significantly reduced signaling to SKBR3  
 267 compared to the wild-type (WT). No variants selected based on binding show a significant difference to the WT.  
 268 Mean and S.E.M. were obtained from two independent experiments conducted with triplicates. For assessing  
 269 significance, Dunnett's multiple comparisons test was used with the following indicators: \* P < 0.01, \*\* P < 0.001,  
 270 \*\*\* P < 0.0001. **e** ELISA data of antigen-binding from CAR variants expressed in soluble scFv form. The variable  
 271 heavy and light chains of the CAR variants were expressed in bacteria with a His tag. Following immobilization  
 272 on a plate with a monoclonal anti-His tag antibody, binding to varying concentrations of biotinylated HER2 was  
 273 detected with the addition of Streptavidin-HRP.

274

275 Finally, we aimed to quantitatively understand the impact of antigen-binding of our CAR variants that showed  
276 discriminative activation based on HER2 surface expression. We expressed the binding domain of the CARs in  
277 soluble scFv form and measured their binding to HER2 antigen by ELISA (Figure 6e). This assay revealed strong  
278 decreases in binding for all of the discriminating variants. By comparison, the variant G6C, obtained by binding  
279 selection, showed only a modest reduction in binding relative to the initial 4D5 scFv. Furthermore, we found that  
280 the variant F5, which was largely unresponsive to SKBR3 (Figure 3c), displayed a binding curve similar to that of  
281 the discriminating variants, highlighting a divergence between cell responsiveness and antigen-binding. Taken  
282 together, this suggests that signaling-based selection is a superior strategy to binding-based selection for  
283 identifying CAR T cell variants that can discriminate based on tumour antigen surface expression.

284

## 285 **DISCUSSION**

286 Through a series of genome editing steps, we have engineered a CAR T cell display platform for screening based  
287 on signaling based-activation or antigen binding. We have demonstrated its value for affinity tuning, a simple and  
288 yet effective method to reduce the likelihood of on-target, off-tumour effects. This approach relies on general  
289 principles of genome editing and directed evolution, and has the potential to eliminate instances of toxicity early  
290 in the development pipeline of CAR-based immunotherapies. The benefits of decoupling receptor affinity and T  
291 cell activation were first shown by Chmielewski *et al.*, which in a study found that CARs with  $K_d$  affinity values  
292 above  $10^{-8}$  M responded strongly to high HER2-expressing cell lines in vitro, but were not activated in the presence  
293 of low HER2-expressing lines, unlike their higher affinity counterparts<sup>43</sup>. This result encapsulates a paradox of  
294 affinity in the context of cell-mediated cytotoxicity: while high affinity theoretically implies exquisite specificity  
295 at the epitope level, specificity at the cell/tissue level can in fact be impaired due to an inability to discriminate  
296 between antigen levels. Furthermore, there may be additional benefits to reducing CAR affinity, such as greater  
297 cell expansion and longer persistence<sup>44</sup>. These observations are likely a factor for the characteristic low binding  
298 affinity of endogenous TCRs relative to that of B cell receptors and antibodies<sup>45</sup>. In T cell maturation, central  
299 tolerance mechanisms ensure that high-affinity self-reactive T cells are removed from the immune repertoire. For  
300 CAR engineering, a process must be devised with an equivalent outcome to avoid targeting cells expressing normal  
301 levels of oncogenes.

302

303 Our CAR display platform closes existing gaps in current methods of tuning target selectivity. Previous examples  
304 have relied on utilizing low affinity antibodies to rationally design CARs with safer target selectivity<sup>24, 25, 26, 27, 28,</sup>  
305<sup>29</sup>. While our platform can also be used to rapidly assess the functionality of rationally designed variants, its true  
306 strength lies in its ability to accommodate library generation and functional screening. Given the uncertainty  
307 surrounding the threshold of affinity required for CAR triggering, optimizing CAR safety benefits greatly from a  
308 readout for cell signaling. Here, the IL2-GFP reporter acted as a “guardrail”, preventing selected variants from  
309 “falling” into non-functionality. This is especially important since the activation threshold varies across antigens  
310 and epitopes<sup>26, 43</sup>, and may vary across CAR signaling components (e.g., CD28 vs. 4-1BB co-signaling domain)  
311<sup>46</sup>. Differences in epitopes may in fact explain why no activity was observed with the CAR scFv variant F5, which  
312 was derived from a phage display library screened for triggering the intracellular uptake of bound HER2<sup>39</sup>. Epitope  
313 mapping suggests that it targets the membrane-distal domain 1 of HER2, while the 4D5 antibody targets the  
314 membrane-proximal domain 4<sup>39, 47</sup>. It is not immediately clear why this difference affects CAR triggering, despite  
315 the relative binding of F5 being seemingly comparable to that of our variants which maintain signaling. Until such

316 questions are resolved, a display platform such as ours that enables the detection of signaling activation ensures  
317 that no prior knowledge regarding the strength of the affinity or the targeted epitope is required for optimizing a  
318 CAR.

319  
320 Engineering a CAR for selectivity based on tumour antigen surface expression relies on the important notion that  
321 antigen-binding affinity and antigen-induced signaling strength can diverge. This is most apparent for CARs with  
322 high binding affinities, where a “ceiling” is encountered above which activation does not improve further<sup>23, 43</sup>.  
323 This ceiling implies that reducing CAR affinity does not necessarily lead to a decline in responsiveness to a target  
324 tumour, and so signaling is a more “relaxed” constraint than binding. This was evident as we attempted to also  
325 select low affinity variants by antigen binding selection, but this was not successful on its own in identifying  
326 variants that could discriminate on the basis of tumour antigen surface expression. A possible reason for this is  
327 that our selection (gating) strategy was too conservative and did not sufficiently deviate from the B3-High strategy.  
328 The difficulty of selecting an appropriate gating strategy further supports the use of signaling-based selection  
329 which was trivial by contrast, merely requiring that all GFP-positive clones be selected. Furthermore, although our  
330 end goal was to improve discrimination between two cell lines, SKBR3 and MCF-7, it is notable that the latter  
331 played no part in our selection strategies. As the difference in antigen levels between the two cell lines was  
332 relatively large, no negative selection step was required. The binding libraries might have benefited from negative  
333 selection, but this was constrained by the low sensitivity of fluorescence-based binding detection, which made it  
334 difficult to distinguish weak-binders from non-binders. This became especially apparent once we had obtained  
335 discriminating variants by signaling selection, as these showed no detectable binding to soluble antigen by flow  
336 cytometry, despite co-culture and ELISA assays confirming their function. Signaling pathways can amplify signals  
337 that are mistakenly deemed too weak to trigger a response, even when the reporter includes significant signal  
338 dampening through negative regulation<sup>48</sup>. The endogenous IL-2 promoter offers a suitable sensitivity as a reporter  
339 of CAR T cell activation for screening purposes.

340  
341 Our affinity tuning approach also benefited from the combination of DMS, which can cover a large sequence space  
342 in an unbiased way, and from deep sequencing, which revealed the substitutions that became enriched as a result  
343 of different selection approaches. Performing a single-site saturation mutagenesis scan can avoid shifting the target  
344 epitope too far from what has been deemed a good target site, saving us from “reinventing the wheel” by screening  
345 novel variable heavy and light chain combinations. As the majority of random mutations do not improve a protein’s  
346 function, we hypothesized that a combination of random mutagenesis and relaxed selection constraint would  
347 broaden and left-skew the distribution of binding affinities. After a single-mutation scan, our experiment resulted  
348 in a moderate improvement in antigen-level discrimination across the whole library level solely through the  
349 signaling-based selection strategy, validating this approach. However, the binding selection strategies also proved  
350 essential for identifying the specific mutations responsible for this phenotype. The enrichment of our best variants,  
351 M12E and Y10R, did not lead them to dominate the S3 library, since the strong HER2 binding variants were not  
352 depleted by the relaxed signaling-based constraints. Rather, the depletion of M12E and Y10R in the B3 libraries  
353 was key for highlighting their tuned affinity. In fact, the Y10 position showed strong negative selection in these  
354 libraries, revealing its value for discriminative activation. The use of DMS and parallel selection strategies thus  
355 appears to be a promising method for gaining insight on key residues that can be altered without abrogating the  
356 antigen-specific signaling response.

357  
358 As the CAR immunotherapy field shifts towards addressing solid tumours, an increasingly diverse array of  
359 antigens requires targeting, and so more instances of off-tumour toxicity will be encountered. This does not have  
360 to lead to the exclusion of valid targets and abandoning the wide range of high-affinity antibodies that have been  
361 discovered to date. Rather, it is likely that many of these are amenable to tuning CAR selectivity at little or no cost  
362 to the maximal signaling response, provided that the target antigen is overexpressed on malignant cells. Our CAR  
363 display platform facilitates this process by enabling library generation and high-throughput functional screening.  
364 The simplicity of this method may present notable advantages versus more complex approaches (e.g.,  
365 combinatorial logic gates and soluble molecules) that have been put forward to deal with off-tumour toxicity  
366 effects. Alternatively, engineering CAR selectivity based on antigen affinity could be combined with such  
367 methods. For instance, multi-specific CAR T cells have recently been developed that integrate the recognition of  
368 two targets<sup>49,50,51</sup>. In such a system, it is crucial that no single binding domain can trigger a cytotoxic response on  
369 its own<sup>16</sup>. Such constructs could potentially be balanced by tuning CAR antigen binding as described here.  
370 Functional display platforms can thus accelerate the development of increasingly sophisticated cell-based  
371 immunotherapy treatments that are both effective and safe.

## 372 373 **METHODS**

### 374 *Cell culture*

375 B3Z cells were cultured in Iscove's Modified Dulbecco's Medium (IMDM) with Glutamax; SKBR3, MCF-7 and  
376 HEK293 cells were cultured in Dulbecco's Modified Eagle Medium (DMEM) (Gibco). Culture media were  
377 supplemented with 10% fetal bovine serum, 1% Penicillin-Streptomycin (Gibco) and 100 µg/mL Normocin  
378 (Invivogen). For passages and experiments, adherent cell lines were detached using TrypLE™ Express (Thermo  
379 Fischer) at 37°C.

### 380 381 *Genome editing and sequencing*

382 Genomic modifications of B3Z cells were performed by CRISPR/Cas9 genome editing. Guide RNA (gRNA) was  
383 assembled as a crRNA (Supplementary Table 2) and tracrRNA duplex according to the manufacturer's instructions  
384 (IDT). For cell lines without endogenous Cas9 expression, a ribonucleoprotein (RNP) was assembled by  
385 incubating the duplex RNA and *Streptococcus pyogenes* Cas9-V3 (IDT) at room temperature for 20 min. For  
386 amplicon HDR, a double-stranded DNA repair template was generated by PCR with flanking homology arms of  
387 ~700 bp in length; 5 µg of purified product was used for the transfection. For ssODN HDR, 500 pmol ultramer  
388 (IDT) was used. Transfections (electroporations) were carried out using a Lonza 4D-Nucleofector according to  
389 recommended protocols. Briefly, 500,000 B3Z cells were collected and resuspended in SF buffer. The RNP/DNA  
390 mixture was added to the cells in a 1:10 ratio for a total volume of 100 µL. Electroporations were performed in  
391 Nucleocuvettes with the program CA-138. Cells were then diluted in 600 µL warm medium. Assays or sorting  
392 were performed at least four days later. To confirm genome editing, genomic DNA was extracted from at least 10<sup>4</sup>  
393 harvested cells using the QuickExtract protocol (Lucigen). The target locus was then amplified by PCR with  
394 forward and reverse primers where at least one primer annealed outside the integration site (Supplementary Table  
395 1). Sanger sequencing was used to confirm correct integration of HDR templates.

396  
397

398 *Flow cytometry and cell labeling*

399 The expression of surface markers or of the genomically-integrated green fluorescence protein (GFP) were  
400 assessed by flow cytometry. Cells were first washed in Dulbecco's PBS (DPBS) prior to labeling. For CAR  
401 detection, labeling with 1:200 biotinylated anti-Strep tag antibody (GenScript) was followed by 1:500  
402 BrilliantViolet 421 conjugated with Streptavidin (Biolegend). To assess HER2 binding, cells were incubated with  
403 2.5 µg/mL soluble HER2 antigen (Merck) and then with 1:250 APC-labeled anti-human HER2 antibody  
404 (Biolegend). The same antibody and concentrations were used to measure surface HER2 expression on cell lines  
405 SKBR3, MCF-7 and HEK293. For TCR expression, cells were stained with 1:200 APC-labeled anti-mouse  
406 Vβ5.1/5.2 antibody (Biolegend). For CD3ε expression, cells were stained with 1:200 APC-labeled anti-mouse  
407 CD3ε antibody (Biolegend). Cells were kept in DPBS on ice until analytical flow cytometry or FACS. Flow  
408 cytometry data were analysed by Flowjo.

409

410 *Co-culture assays and sorting*

411 CAR-expressing B3Z cells were co-cultured in a 1:1 ratio with HER2-expressing cells (SKBR3, MCF-7 or  
412 HEK293) in B3Z medium for 16 hours. All cells were then collected, washed in DPBS and stained for flow  
413 cytometry analysis or sorting. For assays,  $2.5 \times 10^4$  B3Z cells were used, while  $3 \times 10^6$  cells were used for sorting.

414

415 *Deep mutational scanning*

416 The DMS CAR library was generated by CRISPR-Cas9 genome editing of the 4D5 CDRH3 with a pool of single-  
417 stranded DNA HDR mutant repair templates, as done previously<sup>31</sup>. Briefly, gRNA targeting the CDRH3 of the  
418 anti-HER2 CAR in the CAR T cell platform was used to obtain a monoclonal T cell line with a frameshift deletion  
419 abrogating CAR expression. This deletion was then repaired with a pool of HDR templates encoding single amino  
420 acid substitutions of the CDRH3. The pool was designed with tiled degenerate codons such that all possible amino  
421 acid substitutions were represented along 10 positions of the CDRH3. The HDR templates were transfected in the  
422 non-CAR expressing T cells, along with gRNA targeting the CDRH3 deletion. To identify enriched CAR variants  
423 post-selection, deep sequencing of the libraries was done by a nested PCR strategy to amplify a 401 bp fragment  
424 from genomic DNA, which included the CDRH3. A first PCR was performed to amplify the entire CAR transgene;  
425 the product was then used as a template for amplification of the smaller CDRH3-containing region. Second, the  
426 product was used in a PCR with primers CDRH3\_seq\_F and CDRH3\_seq\_R (Supplementary Table 1). The  
427 resulting fragments were purified and sequenced by GENEWIZ (Leipzig, Germany). Only sequences with a  
428 complete CDR3 harboring a single amino acid substitution (resulting from DMS) were considered in the analysis.  
429 The relative abundance of each variant was extracted and used to calculate enrichment ratios with respect to the  
430 initial CAR library ("NNK" in the text).

431

432 *Recombinant expression and measurement of scFv binding to antigen*

433 Soluble scFv proteins were recombinantly expressed: the coding sequences were cloned in a bacterial pET28  
434 expression vector with a C-terminal His tag and transformed into BL21-DE3 competent *E. coli* cells (NEB). Cells  
435 were grown in LB medium at 37°C to an optical density at 600 nm ( $OD_{600}$ ) of 0.6 and protein expression was  
436 induced with 1 nM IPTG for 24 hours at 20°C. Cells were then harvested by centrifugation, and proteins were  
437 recovered from the periplasm by sonication. TALON metal affinity chromatography was used for purification as  
438 previously described<sup>52</sup>. ELISA assays were done with material and reagents from Thermo Fisher Scientific. For

439 this, soluble HER2 antigen was first biotinylated with the EZ-Link™ NHS-PEG4-Biotin reagent for eventual  
440 detection. Nunc Maxisorp 96-well plates were coated with 2 µg/mL mouse IgG2b monoclonal 6x-His tag antibody  
441 (HIS.H8) and the subsequent blocking was done with ELISA/ELISPOT diluent. The His-tagged scFv proteins  
442 were allowed to bind at a concentration of 2 µg/mL, followed by varying concentrations of biotinylated HER2  
443 antigen, for 2 hours each. Detection was done with tetramethylbenzidine (TMB) substrate solution and 1:1000  
444 Ultra Streptavidin-HRP. The enzymatic reaction was stopped with 0.16 M sulfuric acid. Readings were done with  
445 a Infinite Pro M200 plate reader (Tecan) at 450 nm with subtraction at 570 nm.

446

#### 447 **AUTHOR CONTRIBUTIONS**

448 R.B.D.R. and S.T.R. designed the study; R.B.D.R., R.C.R., S.F., D.E. and R.V.-L. performed experiments;  
449 R.B.D.R., R.C.R. and S.T.R. discussed results. R.B.D.R., R.C.R. and S.T.R. wrote the manuscript with input and  
450 commentaries from all authors.

451

#### 452 **ACKNOWLEDGMENTS**

453 We acknowledge the ETH Zurich D-BSSE Single Cell Unit for excellent support and assistance. This work was  
454 supported by a ETH Zurich Post-doctoral Fellowship (to R.B.D.R.), a Personalized Health and Related  
455 Technologies Post-doctoral Fellowship (to R.V.-L.) and a NCCR Molecular Systems Engineering (to S.T.R.)

456

#### 457 **COMPETING INTERESTS**

458 There are no competing interests to declare

459

#### 460 **DATA AVAILABILITY**

461 The raw FASTQ files from deep sequencing that support the findings of this study will be deposited (following  
462 peer-review and publication) in the Sequence Read Archive (SRA) with the primary accession code(s) <code(s)  
463 (<https://www.ncbi.nlm.nih.gov/sra>)>. Additional data that support the findings of this study are available from the  
464 corresponding author upon reasonable request.

465

#### 466 **REFERENCES**

467

- 468 1. Fesnak AD, June CH, Levine BL. Engineered T cells: the promise and challenges of cancer  
469 immunotherapy. *Nat Rev Cancer* **16**, 566-581 (2016).
- 470
- 471 2. Maude SL, *et al.* Chimeric Antigen Receptor T Cells for Sustained Remissions in Leukemia. *New Engl*  
472 *J Med* **371**, 1507-1517 (2014).
- 473
- 474 3. Schuster SJ, *et al.* Chimeric Antigen Receptor T Cells in Refractory B-Cell Lymphomas. *New Engl J*  
475 *Med* **377**, 2545-2554 (2017).
- 476
- 477 4. Turtle CJ, *et al.* CD19 CAR–T cells of defined CD4+:CD8+ composition in adult B cell ALL patients.  
478 *The Journal of Clinical Investigation* **126**, 2123-2138 (2016).

479

- 480 5. Kochenderfer JN, *et al.* Chemotherapy-refractory diffuse large B-cell lymphoma and indolent B-cell  
481 malignancies can be effectively treated with autologous T cells expressing an anti-CD19 chimeric  
482 antigen receptor. *J Clin Oncol* **33**, 540-549 (2015).  
483
- 484 6. MacKay M, *et al.* The therapeutic landscape for cells engineered with chimeric antigen receptors. *Nat*  
485 *Biotechnol*, (2020).  
486
- 487 7. Lamers CHJ, *et al.* Treatment of Metastatic Renal Cell Carcinoma With CAIX CAR-engineered T cells:  
488 Clinical Evaluation and Management of On-target Toxicity. *Mol Ther* **21**, 904-912 (2013).  
489
- 490 8. Morgan RA, Yang JC, Kitano M, Dudley ME, Laurencot CM, Rosenberg SA. Case Report of a Serious  
491 Adverse Event Following the Administration of T Cells Transduced With a Chimeric Antigen Receptor  
492 Recognizing ERBB2. *Mol Ther* **18**, 843-851 (2010).  
493
- 494 9. Richman SA, *et al.* High-Affinity GD2-Specific CAR T Cells Induce Fatal Encephalitis in a Preclinical  
495 Neuroblastoma Model. *Cancer Immunol Res* **6**, 36-46 (2018).  
496
- 497 10. Tran E, *et al.* Immune targeting of fibroblast activation protein triggers recognition of multipotent bone  
498 marrow stromal cells and cachexia. *J Exp Med* **210**, 1125-1135 (2013).  
499
- 500 11. Yu DH, Hung MC. Overexpression of ErbB2 in cancer and ErbB2-targeting strategies. *Oncogene* **19**,  
501 6115-6121 (2000).  
502
- 503 12. Wilson FR, *et al.* Herceptin (R) (trastuzumab) in HER2-positive early breast cancer: a systematic  
504 review and cumulative network meta-analysis. *Syst Rev-London* **7**, (2018).  
505
- 506 13. Herrmann F, *et al.* HER-2/neu-mediated regulation of components of the MHC class I antigen-  
507 processing pathway. *Cancer Res* **64**, 215-220 (2004).  
508
- 509 14. Maruyama T, *et al.* Inverse correlation of HER2 with MHC class I expression on oesophageal  
510 squamous cell carcinoma. *Brit J Cancer* **103**, 552-559 (2010).  
511
- 512 15. Zhao YB, *et al.* A Herceptin-Based Chimeric Antigen Receptor with Modified Signaling Domains  
513 Leads to Enhanced Survival of Transduced T Lymphocytes and Antitumor Activity. *J Immunol* **183**,  
514 5563-5574 (2009).  
515
- 516 16. Kloss CC, Condomines M, Cartellieri M, Bachmann M, Sadelain M. Combinatorial antigen recognition  
517 with balanced signaling promotes selective tumor eradication by engineered T cells. *Nat Biotechnol* **31**,  
518 71-+ (2013).  
519



- 520 17. Fedorov VD, Themeli M, Sadelain M. PD-1-and CTLA-4-Based Inhibitory Chimeric Antigen  
521 Receptors (iCARs) Divert Off-Target Immunotherapy Responses. *Sci Transl Med* **5**, (2013).  
522
- 523 18. Lanitis E, *et al.* Chimeric Antigen Receptor T Cells with Dissociated Signaling Domains Exhibit  
524 Focused Antitumor Activity with Reduced Potential for Toxicity In Vivo. *Cancer Immunology*  
525 *Research* **1**, 43-53 (2013).  
526
- 527 19. Roybal Kole T, *et al.* Precision Tumor Recognition by T Cells With Combinatorial Antigen-Sensing  
528 Circuits. *Cell* **164**, 770-779 (2016).  
529
- 530 20. Cartellieri M, *et al.* Switching CAR T cells on and off: a novel modular platform for retargeting of T  
531 cells to AML blasts. *Blood Cancer J* **6**, (2016).  
532
- 533 21. Slaga D, *et al.* Avidity-based binding to HER2 results in selective killing of HER2-overexpressing cells  
534 by anti-HER2/CD3. *Sci Transl Med* **10**, (2018).  
535
- 536 22. Gargett T, Brown MP. The inducible caspase-9 suicide gene system as a “safety switch” to limit on-  
537 target, off-tumor toxicities of chimeric antigen receptor T cells. *Frontiers in Pharmacology* **5**, (2014).  
538
- 539 23. Schmid DA, *et al.* Evidence for a TCR Affinity Threshold Delimiting Maximal CD8 T Cell Function. *J*  
540 *Immunol* **184**, 4936-4946 (2010).  
541
- 542 24. Caruso HG, *et al.* Tuning Sensitivity of CAR to EGFR Density Limits Recognition of Normal Tissue  
543 While Maintaining Potent Antitumor Activity. *Cancer Res* **75**, 3505-3518 (2015).  
544
- 545 25. Drent E, *et al.* A Rational Strategy for Reducing On-Target Off-Tumor Effects of CD38-Chimeric  
546 Antigen Receptors by Affinity Optimization. *Mol Ther* **25**, 1946-1958 (2017).  
547
- 548 26. Liu XJ, *et al.* Affinity-Tuned ErbB2 or EGFR Chimeric Antigen Receptor T Cells Exhibit an Increased  
549 Therapeutic Index against Tumors in Mice. *Cancer Res* **75**, 3596-3607 (2015).  
550
- 551 27. Song DG, Ye QR, Poussin M, Liu L, Figini M, Powell DJ. A fully human chimeric antigen receptor  
552 with potent activity against cancer cells but reduced risk for off-tumor toxicity. *Oncotarget* **6**, 21533-  
553 21546 (2015).  
554
- 555 28. Park S, *et al.* Micromolar affinity CAR T cells to ICAM-1 achieves rapid tumor elimination while  
556 avoiding systemic toxicity. *Sci Rep-Uk* **7**, (2017).  
557
- 558 29. Arcangeli S, *et al.* Balance of Anti-CD123 Chimeric Antigen Receptor Binding Affinity and Density  
559 for the Targeting of Acute Myeloid Leukemia. *Mol Ther* **25**, 1933-1945 (2017).  
560

- 561 30. Karttunen J, Sanderson S, Shastri N. Detection of rare antigen-presenting cells by the lacZ T-cell  
562 activation assay suggests an expression cloning strategy for T-cell antigens. *Proc Natl Acad Sci U S A*  
563 **89**, 6020-6024 (1992).  
564
- 565 31. Mason DM, *et al.* High-throughput antibody engineering in mammalian cells by CRISPR/Cas9-  
566 mediated homology-directed mutagenesis. *Nucleic Acids Res* **46**, 7436-7449 (2018).  
567
- 568 32. Cho JH, Okuma A, Al-Rubaye D, Intisar E, Junghans RP, Wong WW. Engineering Axl specific CAR  
569 and SynNotch receptor for cancer therapy. *Sci Rep-Uk* **8**, (2018).  
570
- 571 33. Rydzek J, *et al.* Chimeric Antigen Receptor Library Screening Using a Novel NF-kappa B/NFAT  
572 Reporter Cell Platform. *Mol Ther* **27**, 287-299 (2019).  
573
- 574 34. Uchibori R, *et al.* Functional Analysis of an Inducible Promoter Driven by Activation Signals from a  
575 Chimeric Antigen Receptor. *Mol Ther-Oncolytics* **12**, 16-25 (2019).  
576
- 577 35. Pogson M, Parola C, Kelton WJ, Heuberger P, Reddy ST. Immunogenomic engineering of a plug-and-  
578 (dis)play hybridoma platform. *Nat Commun* **7**, 12535 (2016).  
579
- 580 36. Hawkins RE, Russell SJ, Baier M, Winter G. The Contribution of Contact and Noncontact Residues of  
581 Antibody in the Affinity of Binding to Antigen - the Interaction of Mutant D1.3 Antibodies with  
582 Lysozyme. *J Mol Biol* **234**, 958-964 (1993).  
583
- 584 37. Hudziak RM, Lewis GD, Winget M, Fendly BM, Shepard HM, Ullrich A. p185HER2 monoclonal  
585 antibody has antiproliferative effects in vitro and sensitizes human breast tumor cells to tumor necrosis  
586 factor. *Molecular and Cellular Biology* **9**, 1165-1172 (1989).  
587
- 588 38. Lanteri M, Ollier L, Giordanengo V, Lefebvre J-C. Designing a HER2/neupromoter to drive  
589  $\alpha$ 1,3galactosyltransferase expression for targeted anti- $\alpha$ Gal antibody-mediated tumor cell killing. *Breast*  
590 *Cancer Research* **7**, R487 (2005).  
591
- 592 39. Poul MA, Becerril B, Nielsen UB, Morisson P, Marks JD. Selection of tumor-specific internalizing  
593 human antibodies from phage libraries. *J Mol Biol* **301**, 1149-1161 (2000).  
594
- 595 40. Aucher A, Magdeleine E, Joly E, Hudrisier D. Capture of plasma membrane fragments from target cells  
596 by trogocytosis requires signaling in T cells but not in B cells. *Blood* **111**, 5621-5628 (2008).  
597
- 598 41. Cho HS, *et al.* Structure of the extracellular region of HER2 alone and in complex with the Herceptin  
599 Fab. *Nature* **421**, 756-760 (2003).  
600

- 601 42. Renaud JB, *et al.* Improved Genome Editing Efficiency and Flexibility Using Modified  
602 Oligonucleotides with TALEN and CRISPR-Cas9 Nucleases. *Cell Rep* **14**, 2263-2272 (2016).  
603
- 604 43. Chmielewski M, Hombach A, Heuser C, Adams GP, Abken H. T cell activation by antibody-like  
605 immunoreceptors: Increase in affinity of the single-chain fragment domain above threshold does not  
606 increase T cell activation against antigen-positive target cells but decreases selectivity. *J Immunol* **173**,  
607 7647-7653 (2004).  
608
- 609 44. Ghorashian S, *et al.* Enhanced CAR T cell expansion and prolonged persistence in pediatric patients  
610 with ALL treated with a low-affinity CD19 CAR. *Nat Med* **25**, 1408-+ (2019).  
611
- 612 45. Valitutti S, Lanzavecchia A. Serial triggering of TCRs: A basis for the sensitivity and specificity of  
613 antigen recognition. *Immunol Today* **18**, 299-304 (1997).  
614
- 615 46. Drent E, *et al.* Combined CD28 and 4-1BB Costimulation Potentiates Affinity-tuned Chimeric Antigen  
616 Receptor-engineered T Cells. *Clinical Cancer Research* **25**, 4014-4025 (2019).  
617
- 618 47. Zhou Y, Zhao LQ, Marks JD. Selection and characterization of cell binding and internalizing phage  
619 antibodies. *Arch Biochem Biophys* **526**, 107-113 (2012).  
620
- 621 48. Jain J, Loh C, Rao A. Transcriptional Regulation of the Il-2 Gene. *Curr Opin Immunol* **7**, 333-342  
622 (1995).  
623
- 624 49. Petrov JC, *et al.* Compound CAR T-cells as a double-pronged approach for treating acute myeloid  
625 leukemia. *Leukemia* **32**, 1317-1326 (2018).  
626
- 627 50. Wilkie S, *et al.* Dual Targeting of ErbB2 and MUC1 in Breast Cancer Using Chimeric Antigen  
628 Receptors Engineered to Provide Complementary Signaling. *J Clin Immunol* **32**, 1059-1070 (2012).  
629
- 630 51. Zhang ER, *et al.* Recombination of a dual-CAR-modified T lymphocyte to accurately eliminate  
631 pancreatic malignancy. *J Hematol Oncol* **11**, (2018).  
632
- 633 52. Vazquez-Lombardi R, Nevoltris D, Luthra A, Schofield P, Zimmermann C, Christ D. Transient  
634 expression of human antibodies in mammalian cells. *Nat Protoc* **13**, 99-117 (2018).  
635  
636  
637
